# Supplementary material for: Notch signaling mutations increase intra-tumor chemokine expression and predict response to immunotherapy in colorectal cancer
Source: PubMed Central journal article supplement (PMC9426242; doi:10.1186/s12885-022-10032-5), 2022-08-29

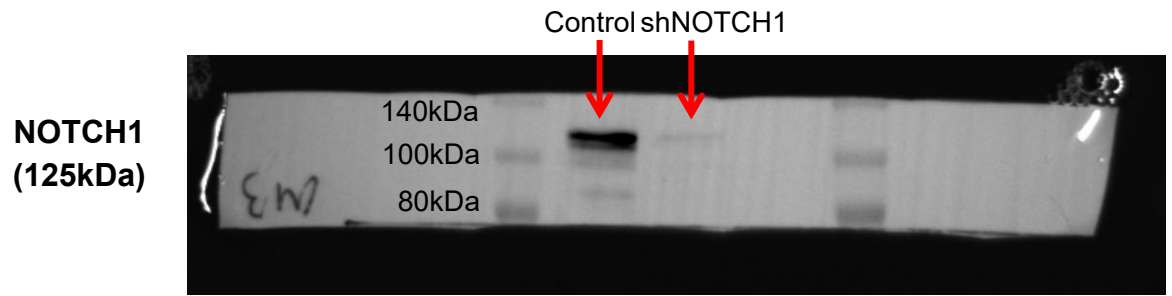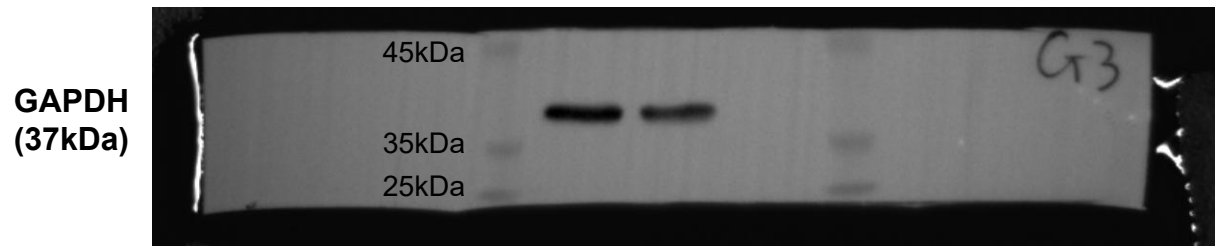

Supplement: 12885_2022_10032_MOESM2_ESM.pdf [file 12885_2022_10032_MOESM2_ESM.pdf]
